# Supplementary material
Source: Springer Nature journal article supplement (https://www.springermedizin.de/resource/supplementary/12960_2006_71_MOESM2_ESM.pdf/9570402)

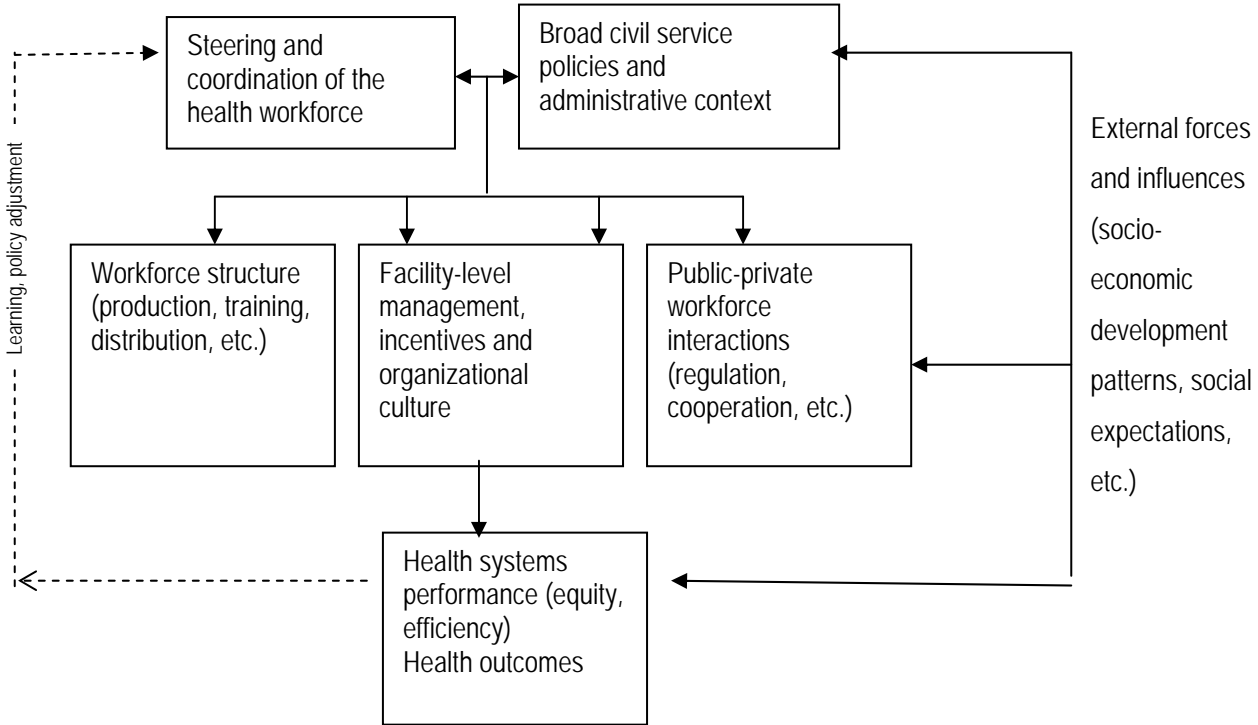

Supplement: MOESM2 [file 9570402]
